# Supplementary material
Source: Springer Nature journal article supplement (https://www.springermedizin.de/resource/supplementary/12974_2005_33_MOESM6_ESM.pdf/9600686)

# A $\beta$ 1-42:40 ratio

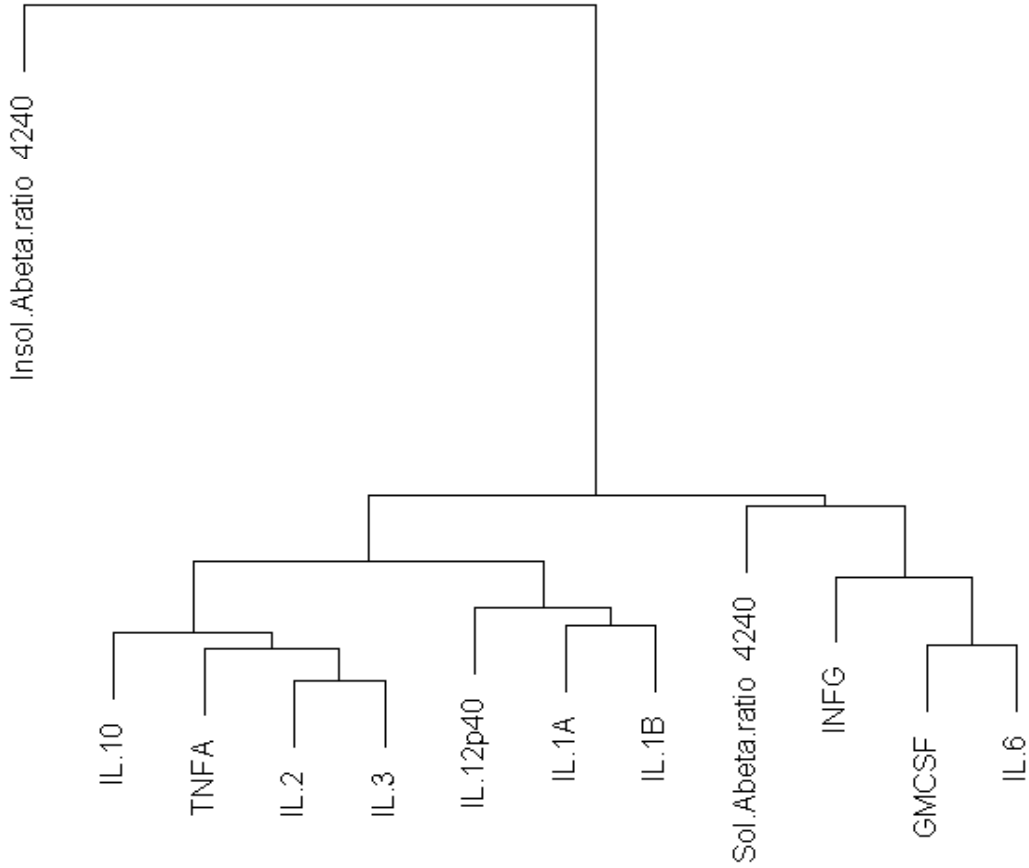

Supplement: MOESM6 [file 9600686]
